# Supplementary material for: Thermal and nutritional environments during development exert different effects on adult reproductive success in Drosophila melanogaster
Source: PubMed Central journal article supplement (PMC7790642; doi:10.1002/ece3.7064), 2020-11-24
Supplement: ECE3-11-443-s001.pdf [file ECE3-11-443-s001.pdf]

## Supplementary materials

Figure S1

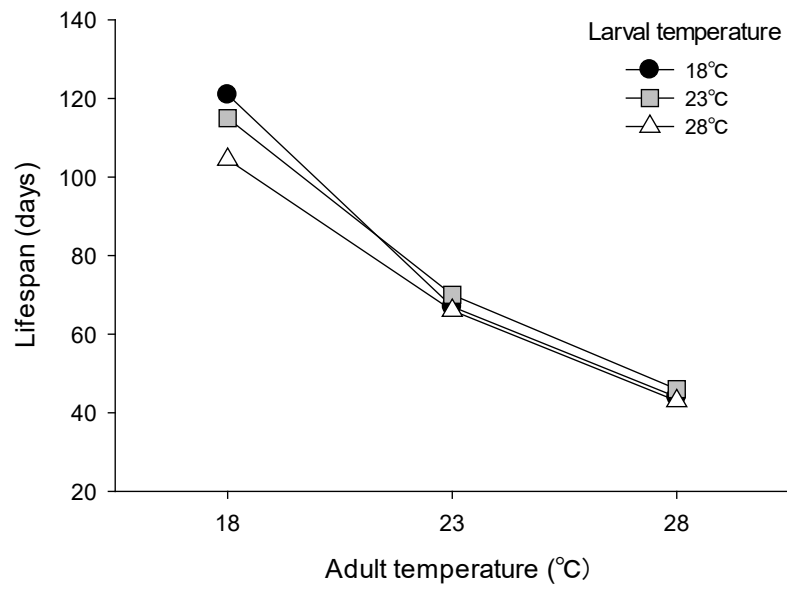

**Figure S1.** Effect of larval and adult temperature on adult lifespan for female *D. melanogaster*. The values are median.

**Figure S2**

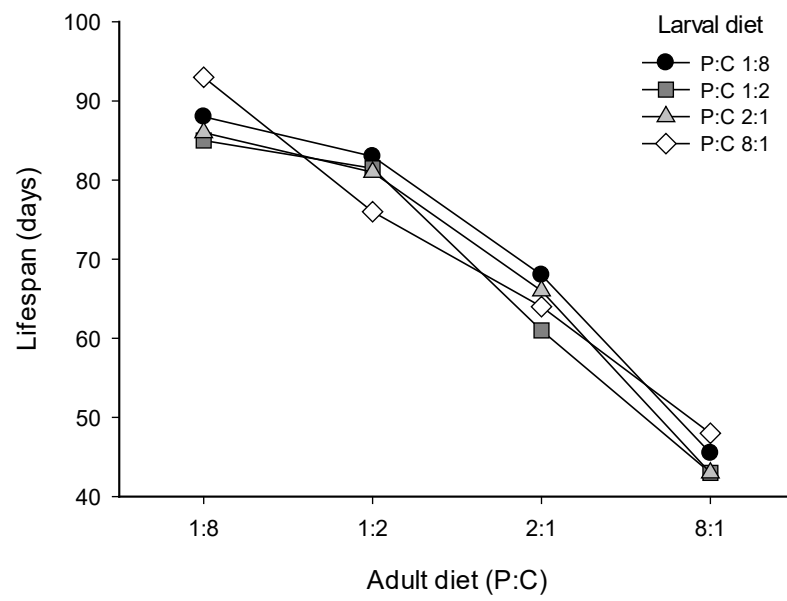

**Figure S2.** Effect of larval and adult diet on lifespan for female *D. melanogaster*. The values are median.
